# Supplementary material for: Pan-Genome Analysis of Transcriptional Regulation in Six Salmonella enterica Serovar Typhimurium Strains Reveals Their Different Regulatory Structures
Source: PubMed Central journal article supplement (PMC9764980; doi:10.1128/msystems.00467-22), 2022-11-01

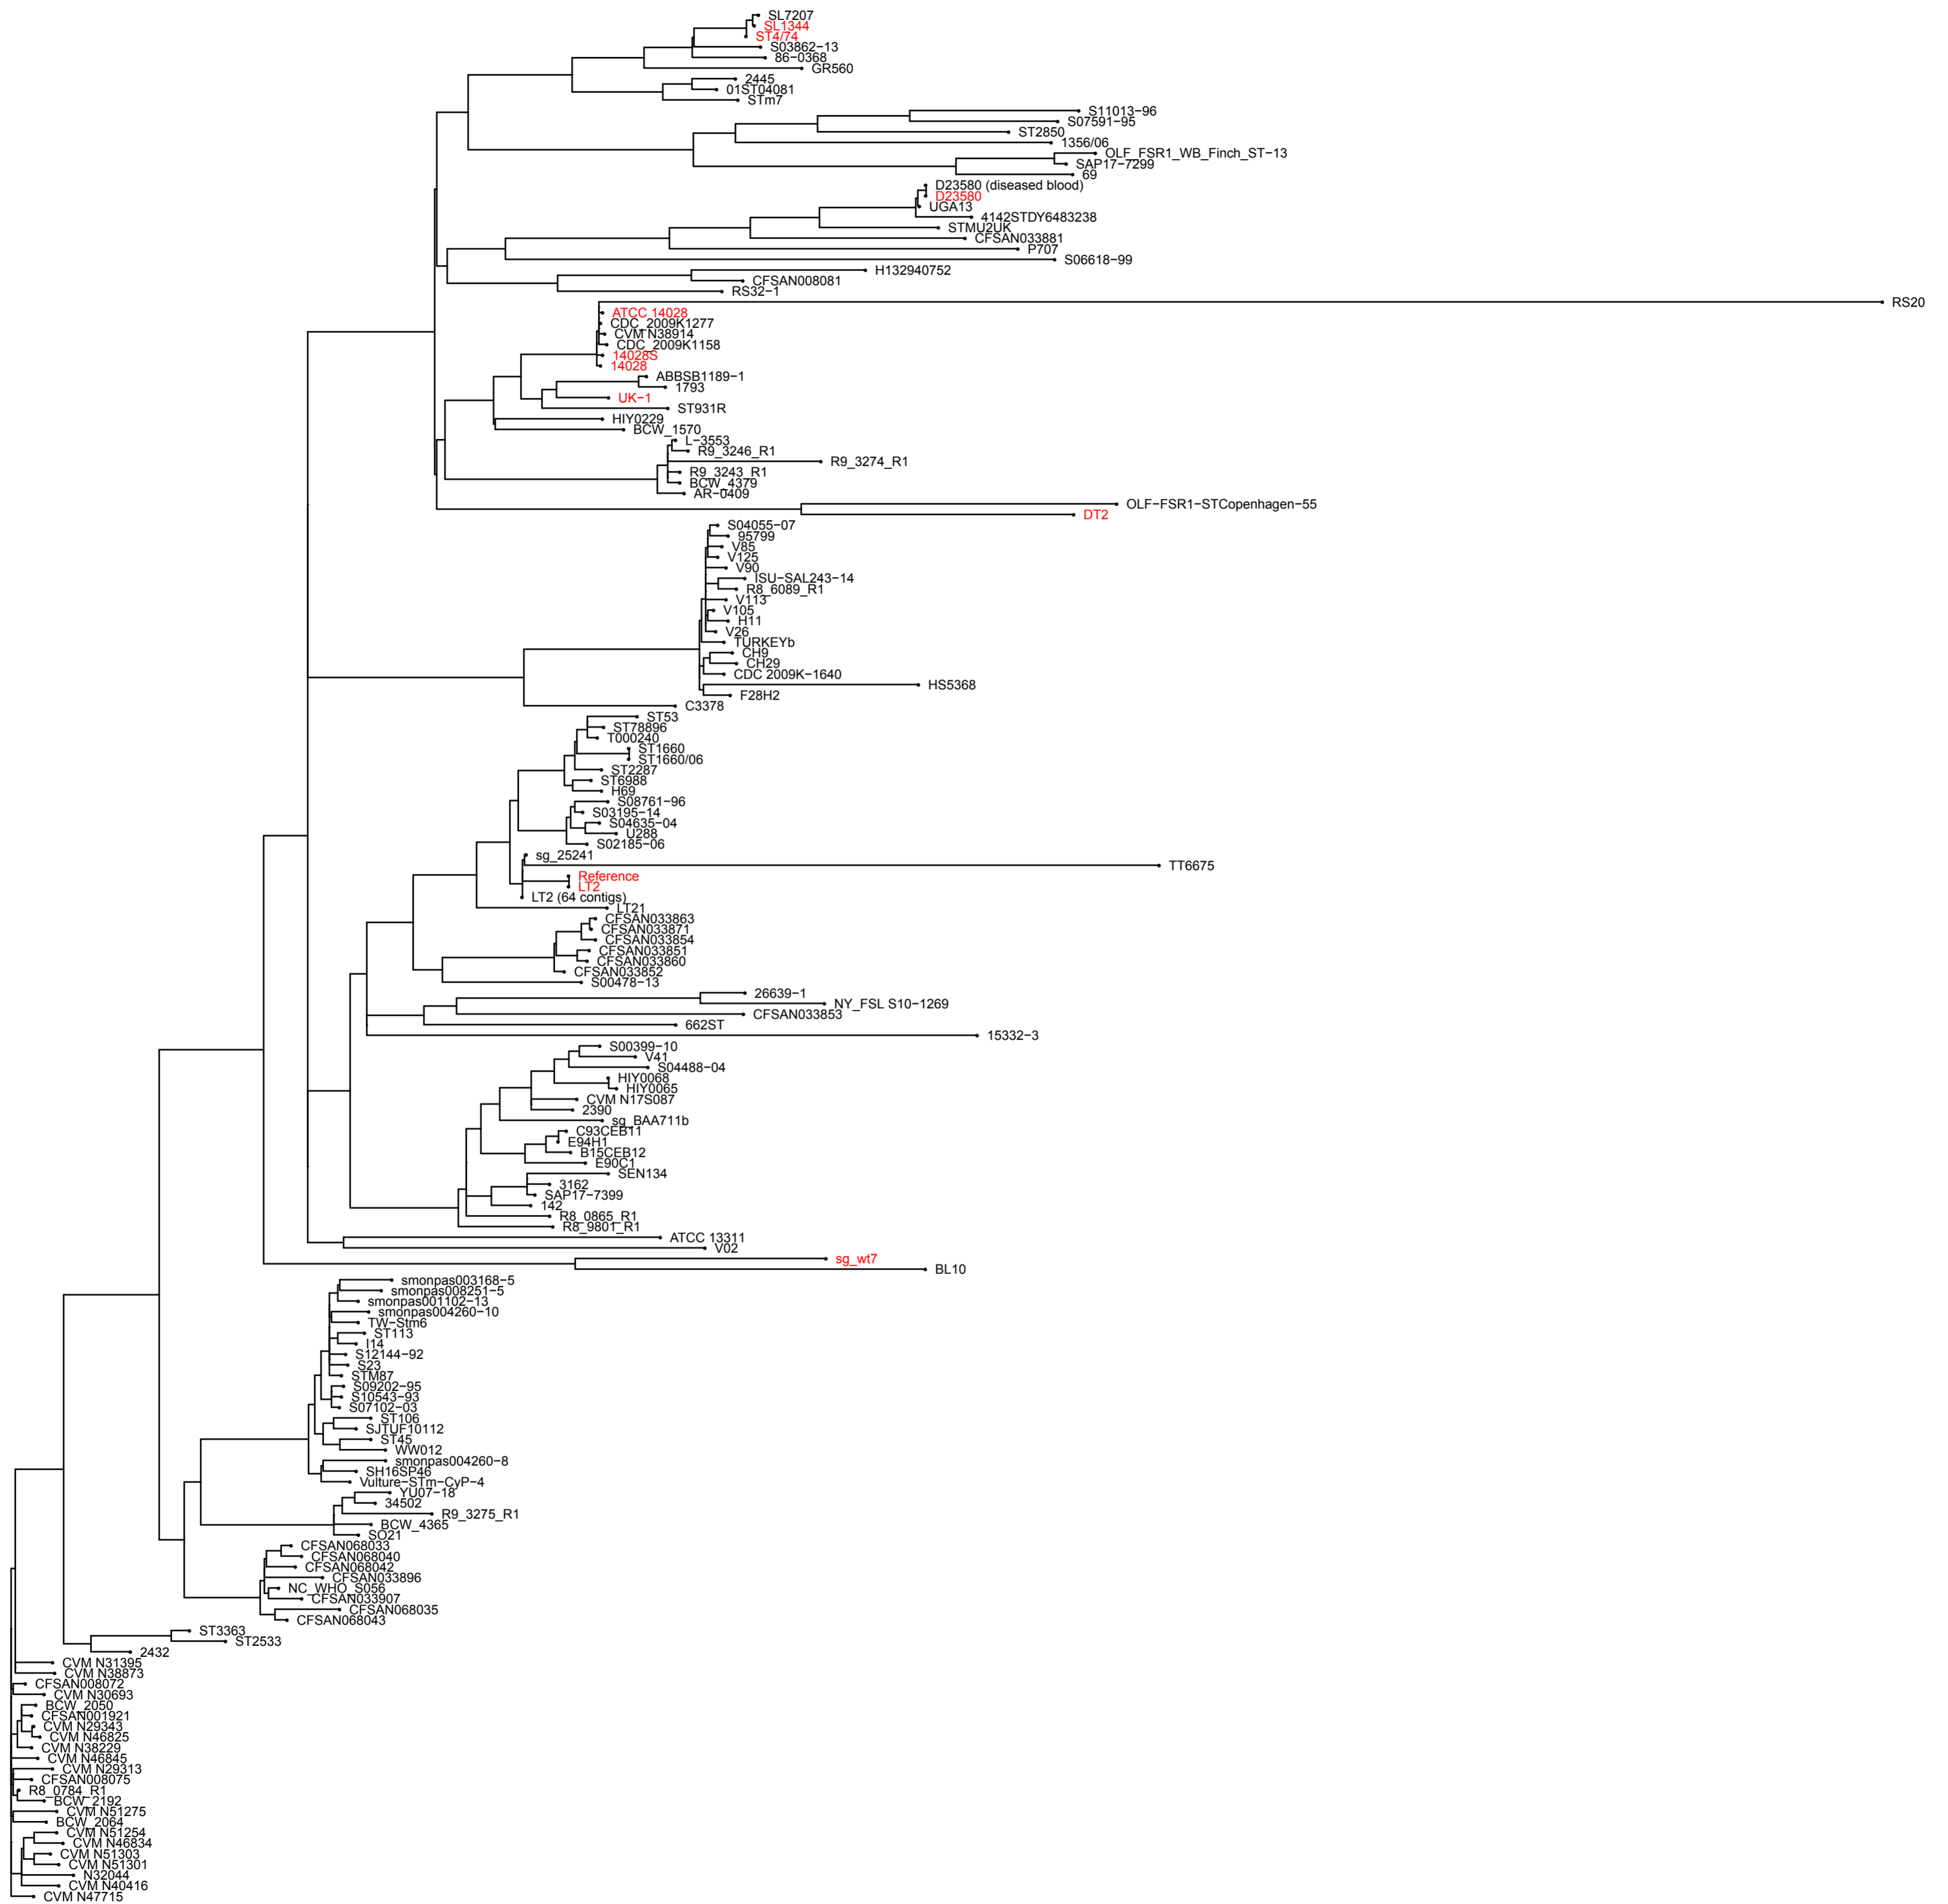

Supplement: msystems.00467-22-s0003.pdf [file msystems.00467-22-s0003.pdf]
