# Supplementary material for: Pan-Genome Analysis of Transcriptional Regulation in Six Salmonella enterica Serovar Typhimurium Strains Reveals Their Different Regulatory Structures
Source: PubMed Central journal article supplement (PMC9764980; doi:10.1128/msystems.00467-22), 2022-11-01
Supplement: msystems.00467-22-s0005.pdf [file msystems.00467-22-s0005.pdf]

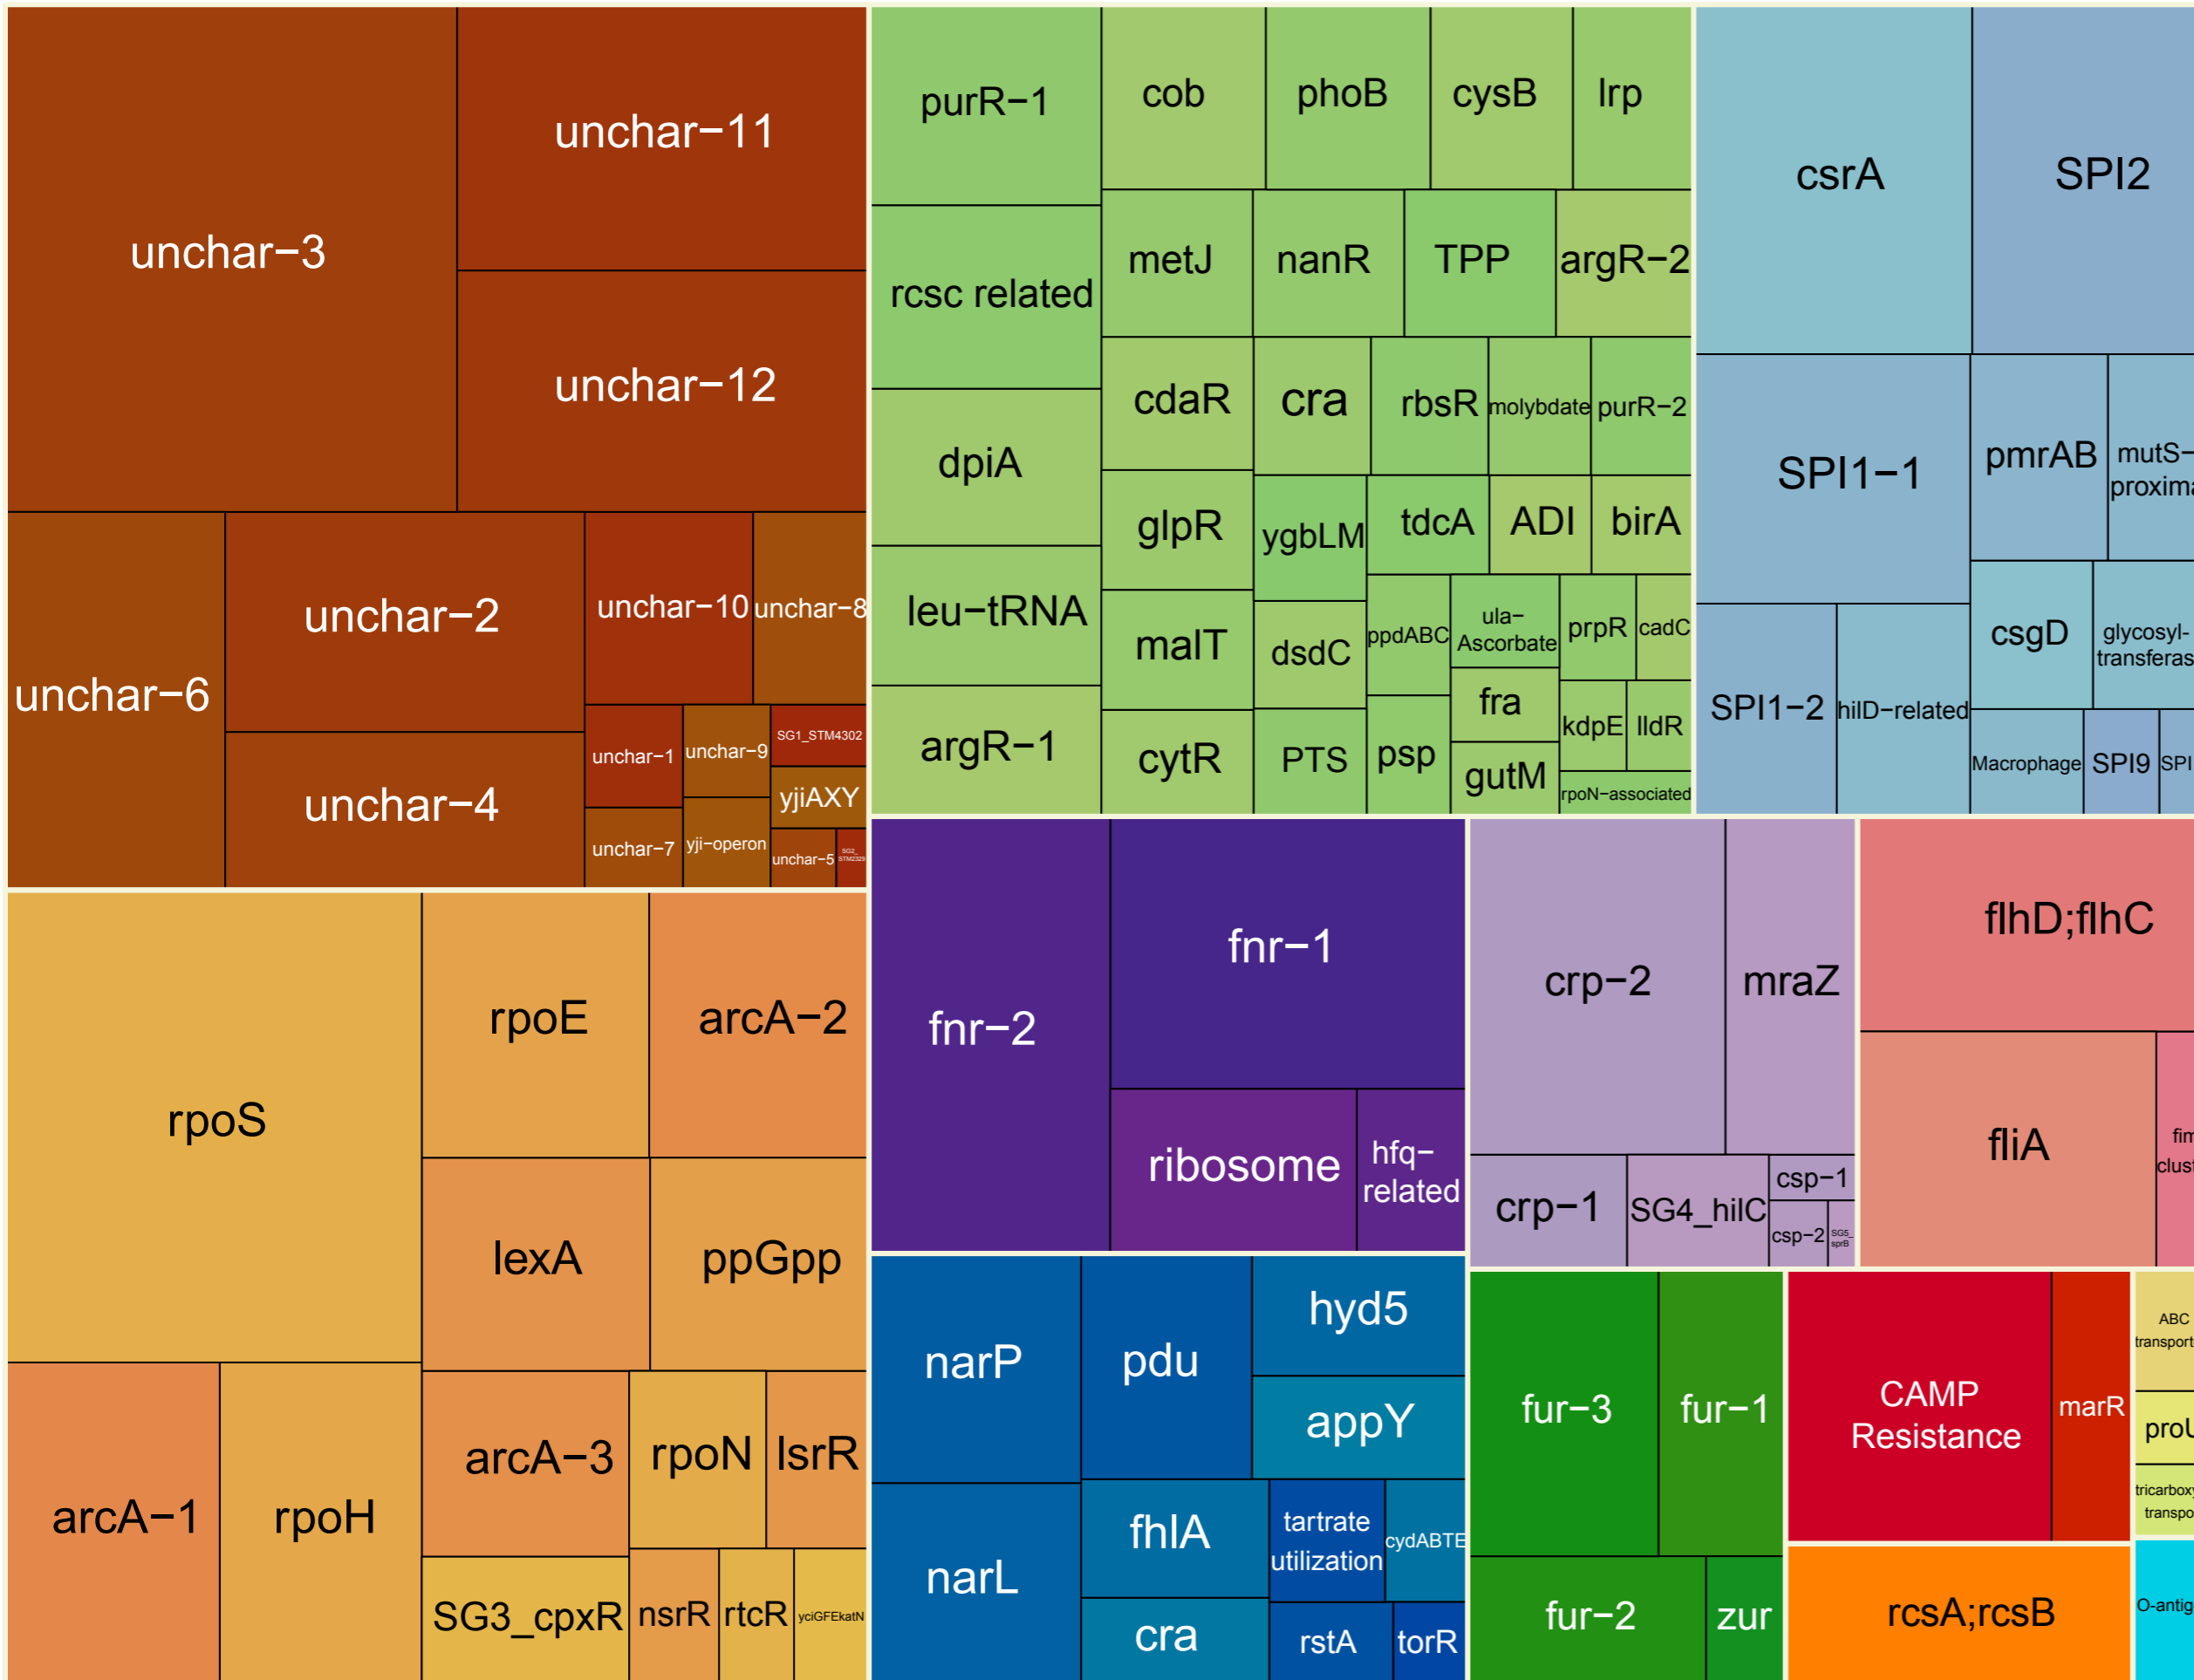

- ### Categories
- Biosynthesis
  - Energy Production
  - Metabolism
  - Metal Homeostasis
  - Motility
  - Resistance
  - Stress Response
  - Structure
  - Transcription
  - Translation
  - Transport
  - Unknown
  - Virulence
